# Supplementary material
Source: PubMed Central journal article supplement (PMC60851)
Supplement: pnas_221467098_1.pdf [file pnas_221467098_1.pdf]

## Statistical Analysis

An index  $i$  refers to family and  $j$  to “sibling” within that family. There are  $n_i$  siblings in the  $i^{th}$  family,  $\mathcal{F}_i$ ; thus,  $j = 1, \dots, n_i$ . The observed phenotype for the  $j^{th}$  sibling in the  $i^{th}$  family, in an appropriate scale, is  $y_{ij}$ .

For OGTT(-10) = fasting glucose, the scale is (fasting glucose)  $^{-1.4} \times (-10^5)$ . For OGTT (60) and OGTT (120), both less important here, the scale is logarithmic. We focus in what follows on OGTT(-10). In any case, the model is

$$y_{ij} = \mu + f_i + \alpha_{ij} + e_{ij} .$$

Here,  $\mu$  is a constant, the overall mean. The random  $f_i$  is the effect of  $\mathcal{F}_i$  on each  $y_{ij}$  for that  $i$ .  $E(f_i) \equiv 0$ ,  $\text{Var}(f_i) \equiv \sigma_{f_i}^2 \equiv \sigma_f^2$ . The “errors”  $e_{ij}$  are random;  $E(e_{ij}) \equiv 0$ ,  $\text{Var}(e_{ij}) \equiv \sigma_e^2$ ;  $\alpha_{ij}$  is the effect of the genotype of the  $j^{th}$  sibling in the  $i^{th}$  family on  $y_{ij}$ .

Here, the trait is assumed recessive.  $\alpha_{ij}$  assumes only two values:  $\alpha_1 > 0$  and  $\alpha_2 < 0$ . Unconditionally,  $\{\alpha_{ij}\}$  are taken to be random.

Conditional on the recessive genotype,  $\alpha_{ij} = \alpha_1$ ; conditional on the other genotypes,  $\alpha_{ij} = \alpha_2$ . We assume that unconditionally,  $E(\alpha_{ij}) \equiv 0$ .  $\text{Var}(e_{ij})$  is then necessarily

$$\sigma_\alpha^2 = [P(\alpha_{ij} \text{ recessive}) \times \alpha_1^2] + [(1 - P(\alpha_{ij} \text{ recessive})) \times \alpha_2^2].$$

$\{f_i, e_{ij}, \alpha_{ij} : j = 1, \dots, n_i, i = 1, 2, \dots\}$  are assumed uncorrelated. They are not assumed independent. Certainly  $\{f_i, e_{ij}\}$  are not assumed Gaussian, jointly or even marginally.

If  $\{f_i, \alpha_i, e_{ij}\}$  were taken to be independent, then it follows from a theorem of H. Cramér that  $y_{ij}$  cannot be Gaussian because  $\alpha_{ij}$  is not.

$$\text{Unconditionally, } \text{Var}(y_{ij}) = \sigma_y^2 = \text{Var}(f_i) + \text{Var}(\alpha_{ij}) + \text{Var}(e_{ij}) = \sigma_f^2 + \sigma_\alpha^2 + \sigma_e^2.$$

The covariance between  $y_{ij}$  and  $y_{ij'}$ ,  $\text{Cov}(y_{ij}, y_{ij'}) = \sigma_\alpha^2$ ; thus, the correlation between the phenotypes of siblings is  $\sigma_\alpha^2 / (\sigma_f^2 + \sigma_\alpha^2 + \sigma_e^2)$ .

We turn now to estimation, in particular to a “method of moments” approach. Because  $E(f_i) \equiv E(\alpha_{ij}) \equiv E(e_{ij}) \equiv 0$ , unconditional on genotype  $E(y_{ij}) = \mu$ . As a consequence, the average of  $y_{ij}$  over all siblings and families is unbiased for  $\mu$ . Call this global average  $\hat{\mu}$ . Now compute  $\{y_{ij} - \hat{\mu}\}$ . Of these,  $n_1$ , say, will have the recessive genotype and  $n_2$  either

of the other two genotypes. Average the  $n_1$  numbers  $\{y_{ij} - \hat{\mu} : \alpha_{ij} = \alpha_1\}$  to obtain the estimate  $\hat{\alpha}_1$  of  $\alpha_1$ . Average the  $n_2$  numbers  $\{y_{ij} - \hat{\mu} : \alpha_{ij} = \alpha_2\}$  to obtain the estimate  $\hat{\alpha}_2$  of  $\alpha_2$ . Note that  $\hat{\mu}, \hat{\alpha}_1$ , and  $\hat{\alpha}_2$  are computed from sibships of all sizes. Now, fix a family  $i$  and siblings  $j$  and  $j'$ . Compute

$$\begin{aligned} (y_{ij} - y_{ij'})^2 &= ((\alpha_{ij} - \alpha_{ij'}) + (e_{ij} - e_{ij'}))^2 \\ &= (\alpha_{ij} - \alpha_{ij'})^2 + (e_{ij} - e_{ij'})^2 + 2(\alpha_{ij} - \alpha_{ij'})(e_{ij} - e_{ij'}). \end{aligned}$$

Our assumptions on correlations entail that

$$\begin{aligned} \text{Cov}(\alpha_{ij}, e_{ij}) &= \text{Cov}(\alpha_{ij}, e_{ij'}) \\ &= \text{Cov}(\alpha_{ij'}, e_{ij}) \\ &= \text{Cov}(\alpha_{ij'}, e_{ij'}) \\ &= 0. \end{aligned}$$

We estimate  $(\alpha_{ij} - \alpha_{ij'})^2$  by  $(\hat{\alpha}_{ij} - \hat{\alpha}_{ij'})^2$ , where  $\hat{\alpha}_{ij}$  is  $\hat{\alpha}_1$  if  $\alpha_{ij}$  is recessive; and  $\hat{\alpha}_{ij} = \hat{\alpha}_2$  otherwise;  $\hat{\alpha}_{ij'}$  is defined by analogy for sibling  $j'$ . Also,  $E\{(e_{ij} - e_{ij'})^2\} = E(e_{ij}^2) + E(e_{ij'}^2) - 2E(e_{ij}e_{ij'}) = \sigma_e^2 + \sigma_e^2 - (2 \times 0)$  in view of our assumptions on correlations. It follows from this that

$$(y_{ij} - y_{ij'})^2 - (\hat{\alpha}_{ij} - \hat{\alpha}_{ij'})^2$$

is approximately unbiased for  $2\sigma_e^2$ . Write  $N_k$  for the number of families with  $k$  siblings, and assume there are at most  $K$  siblings. There are  $k(k-1)$  ways of choosing ordered pairs of siblings within  $\mathcal{F}_i$ , given that it has  $k \geq 2$  siblings. It follows that the

$$\max \left\{ \frac{1}{2 \sum_{k=2}^K N_k k(k-1)} \sum_i \sum_{(j,j') \in \mathcal{F}_i} \{(y_{ij} - y_{ij'})^2 - (\hat{\alpha}_{ij} - \hat{\alpha}_{ij'})^2\}, 0 \right\}$$

is approximately unbiased for  $\sigma_e^2$ . Call the estimate  $\hat{\sigma}_e^2$ . This estimate depends primarily on families with at least two siblings, though obviously  $\hat{\alpha}_{ij}$  and  $\hat{\alpha}_{ij'}$  are computed from all the data. It is inevitable that, with so few assumptions on the components of our model, we will be forced to look mostly within families having at least two siblings to estimate  $\sigma_e^2$ .

Finally, we recall that unconditional on genotype,  $\sigma_y^2 = \text{Var}(y_{ij}) = \sigma_f^2 + \sigma_\alpha^2 + \alpha_e^2$ . Thus, we estimate  $\sigma_f^2$  by subtraction. Estimate  $\sigma_y^2$  by

$$\hat{\sigma}_y^2 = \frac{1}{\sum_{k=2}^K N_k} \sum_{i,j} (y_{ij} - \hat{\mu})^2.$$

Estimate  $\sigma_\alpha^2$  by

$$\hat{\sigma}_\alpha^2 = \left(\frac{n_1}{n_1 + n_2}\right)\hat{\alpha}_1^2 + \left(\frac{n_2}{n_1 + n_2}\right)\hat{\alpha}_2^2 ,$$

and  $\sigma_f^2$  by

$$\hat{\sigma}_f^2 = \hat{\sigma}_y^2 - \hat{\sigma}_\alpha^2 - \hat{\sigma}_e^2 .$$

With all this done,  $\sigma_y^2$  for OGTT(-10) in the given scale is estimated to be made up of 1.76%  $\sigma_\alpha^2$ , 24.81%  $\sigma_f^2$ , and 73.43%  $\sigma_e^2$ . That is,  $\hat{\sigma}_\alpha^2/\hat{\sigma}_y^2 = 0.0176$ , and so on.
